# Supplementary material
Source: Springer Nature journal article supplement (https://www.springermedizin.de/resource/supplementary/12889_2012_5112_MOESM3_ESM.pdf/9494616)

Moderate Activity Scores  
Spearman Correlation = .29

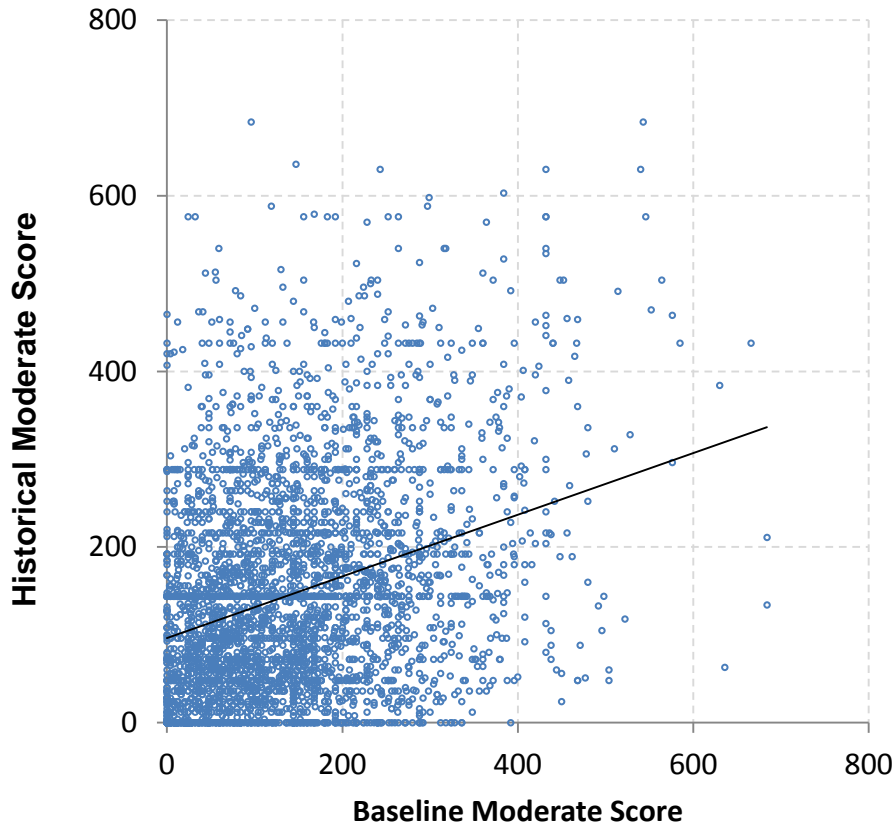

Vigorous-Intensity Activity Scores  
Spearman Correlation = .50

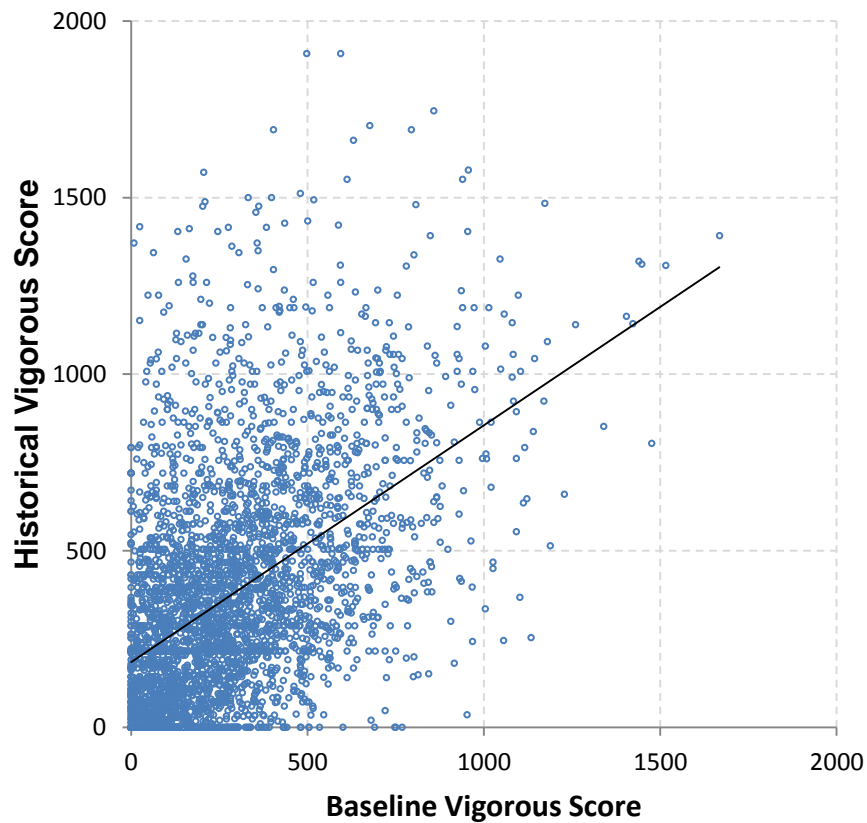

Supplement: MOESM3 [file 9494616]
